# Supplementary material
Source: PubMed Central journal article supplement (PMC9744573)
Supplement: GBB-21-e12752-s001.pdf [file GBB-21-e12752-s001.pdf]

1 **SUPPLEMENTARY FIGURES**

2 **Title:** Profiling beneficial and adverse effects of MeCP2 overexpression in a hypomorphic Rett syndrome mouse  
3 model

4 **Running Title:** MeCP2 overexpression in a hypomorphic Rett syndrome mouse

5 **Keywords:** Rett syndrome; MeCP2; *MECP2* Duplication syndrome; Neurodevelopment; Mouse model

6  
7 **Authors & Affiliations:** Sheryl Anne D. Vermudez<sup>1</sup>, Rocco G. Gogliotti<sup>1,4</sup>, Bright Arthur<sup>1</sup>, Aditi Buch<sup>1</sup>, Clarissa  
8 Morales<sup>1</sup>, Yuta Moxley<sup>1</sup>, Hemangi Rajpal<sup>1</sup>, P. Jeffrey Conn<sup>1,2,3</sup>, and Colleen M. Niswender<sup>1,2,3\*</sup>

9 <sup>1</sup>Department of Pharmacology and Warren Center for Neuroscience Drug Discovery, Vanderbilt University,  
10 Nashville, TN 37232, USA

11 <sup>2</sup>Vanderbilt Kennedy Center, Vanderbilt University, Nashville, TN 37232, USA

12 <sup>3</sup>Vanderbilt Institute of Chemical Biology, Vanderbilt University, TN 37232, USA

13 <sup>4</sup>Department of Molecular Pharmacology and Neuroscience, Loyola University Chicago, IL 60660, USA

14  
15 \*Corresponding author

16 Colleen M. Niswender

17 12478C MRB IV

18 Vanderbilt University

19 Nashville, TN 37232

20 Office: (615) 343-4303

21 Fax: (615) 343-3088

22 [Colleen.niswender@vanderbilt.edu](mailto:Colleen.niswender@vanderbilt.edu)

23  
24 **Original Submission Date:** February 10, 2021

25 **Resubmission Date:** May 7, 2021

**A**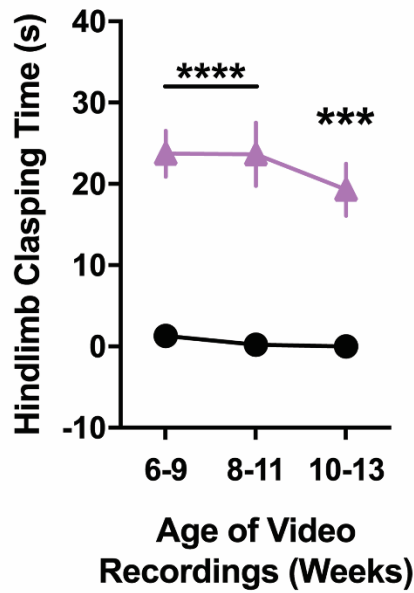**B**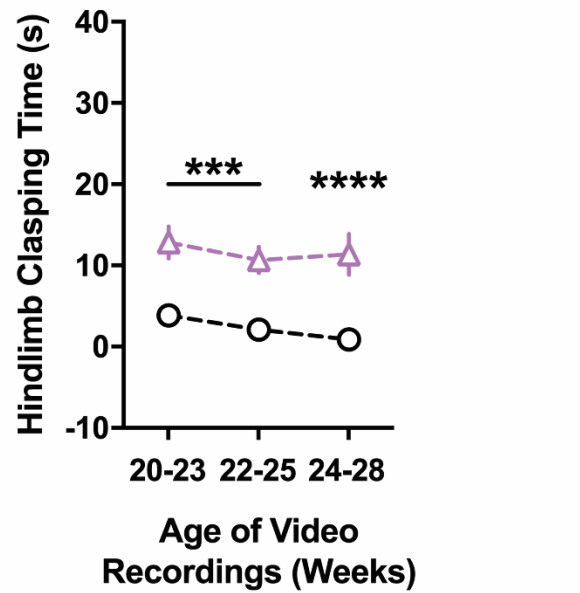● *Mecp2*<sup>+/y</sup>▲ *Mecp2*<sup>R133C/y</sup>○ *Mecp2*<sup>+/+</sup>△ *Mecp2*<sup>R133C/+</sup>

26 **Supplementary Figure 1: Hindlimb clasping is maintained with age in *Mecp2* R133C mice.** (A-C) Hindlimb  
 27 clasping was measured across age for male *Mecp2*<sup>R133C/y</sup> (6-13 weeks old) and female *Mecp2*<sup>R133C/+</sup> (20-28  
 28 weeks old). n=16-30 per genotype in males, n=31-32 per genotype in females. 2-way ANOVA with Sidak's post-  
 29 hoc. \*within-genotype comparison. ns (not significant), \*\*\*p<0.001, \*\*\*\*p<0.0001. WT = closed or open black  
 30 circles. *Mecp2* R133C = closed or open purple triangles.

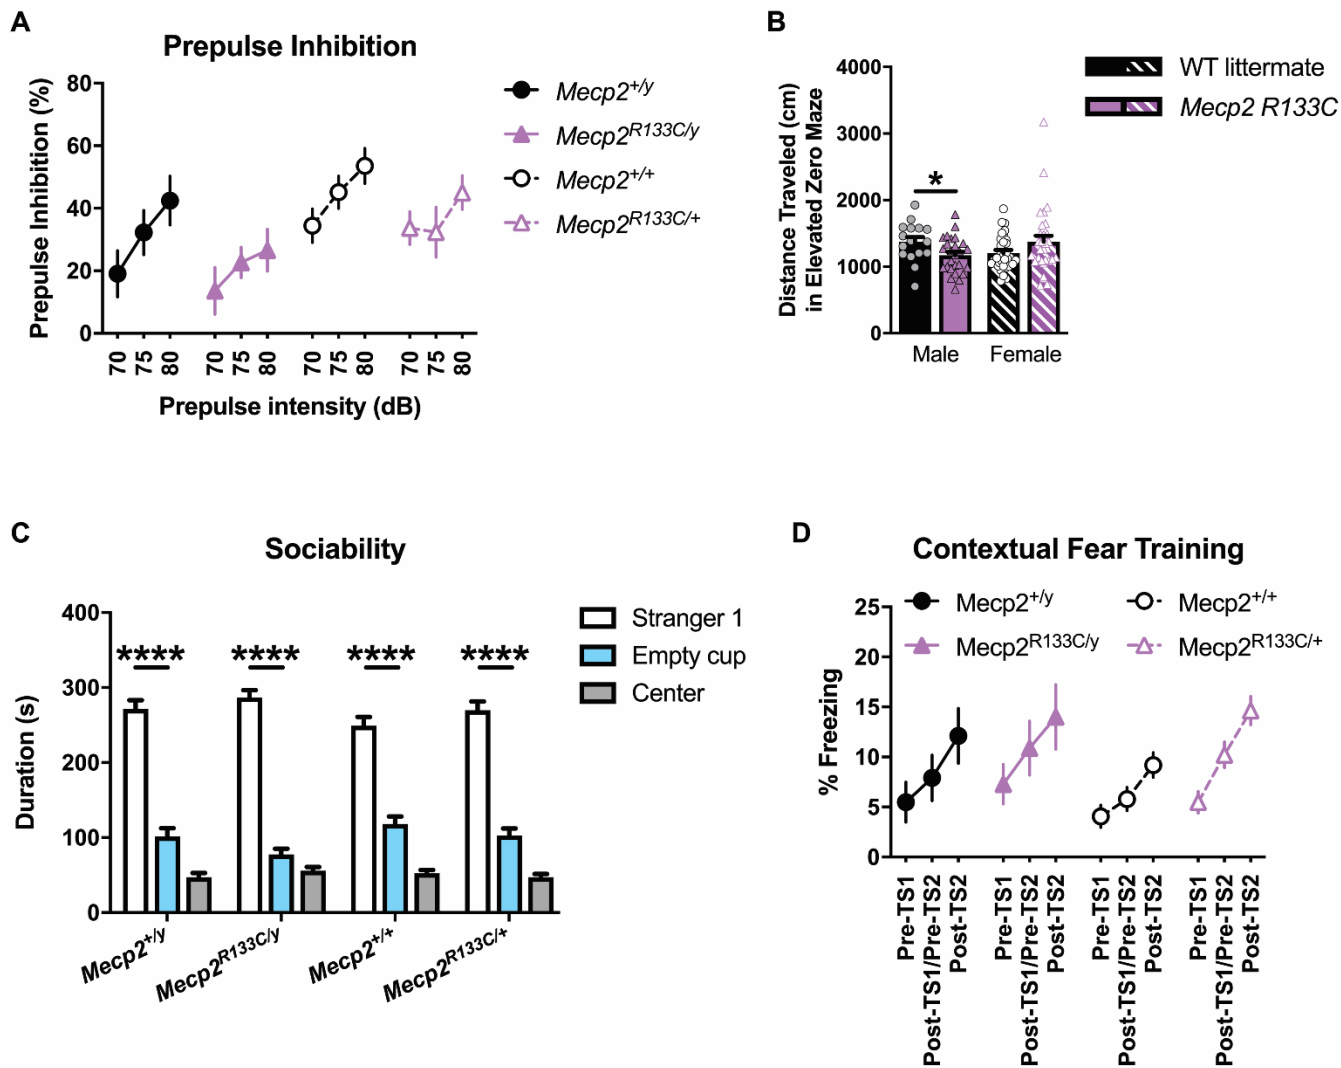

31 **Supplementary Figure 2: Normal behaviors observed in *Mecp2* R133C mice.** (A-C) *Mecp2* R133C mice  
 32 displayed normal sensorimotor gating in pre-pulse inhibition (PPI) across several pre-pulse intensities (A),  
 33 distance traveled in the elevated zero maze (B) and social behavior (C) assays, and spent more time with  
 34 Stranger 1 mouse than the empty cup in the 3-chamber task. (D) On training day of contextual fear conditioning,  
 35 male *Mecp2*<sup>R133C/y</sup> and female *Mecp2*<sup>R133C/+</sup> responded normally to the aversive stimuli. n=13-29 per genotype in  
 36 males, n=18-32 per genotype in females. 2-way ANOVA with t-test post-hoc, or unpaired t-test. \*within-genotype  
 37 comparison. \*\*\*\*p<0.0001. WT = filled or patterned black bars or closed or open black circles. *Mecp2* R133C =  
 38 filled or patterned purple bars or closed or open purple triangles. Male = filled, closed. Female = patterned, open.

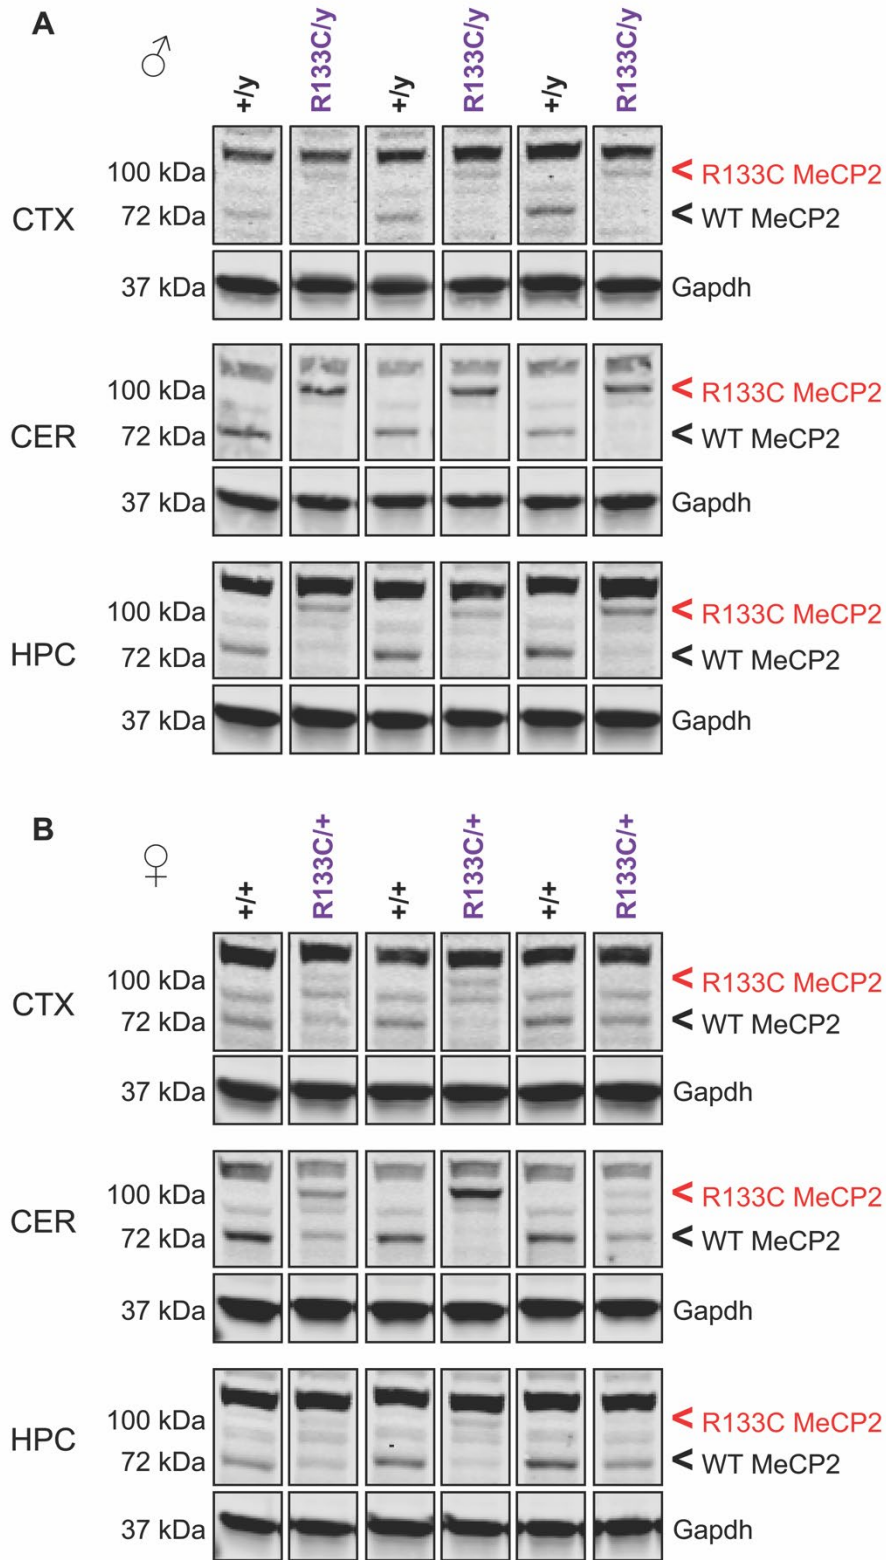

39 **Supplementary Figure 3: WT and R133C mutant MeCP2 proteins are detected in brain samples via**

40 **Western Blotting.** (A-B) Representative images of Western blots and distinct bands are indicated for the R133C

41 mutant (red arrow) and WT MeCP2 (black arrow), as well as the Gapdh control, in male (♂) and female (♀)

42 *Mecp2* R133C mice and WT littermates across several brain regions. +/- or +/+ (WT), R133C/y or R133C/+  
43 (*Mecp2* R133C). CTX (cortex), CER (cerebellum), HPC (hippocampus).

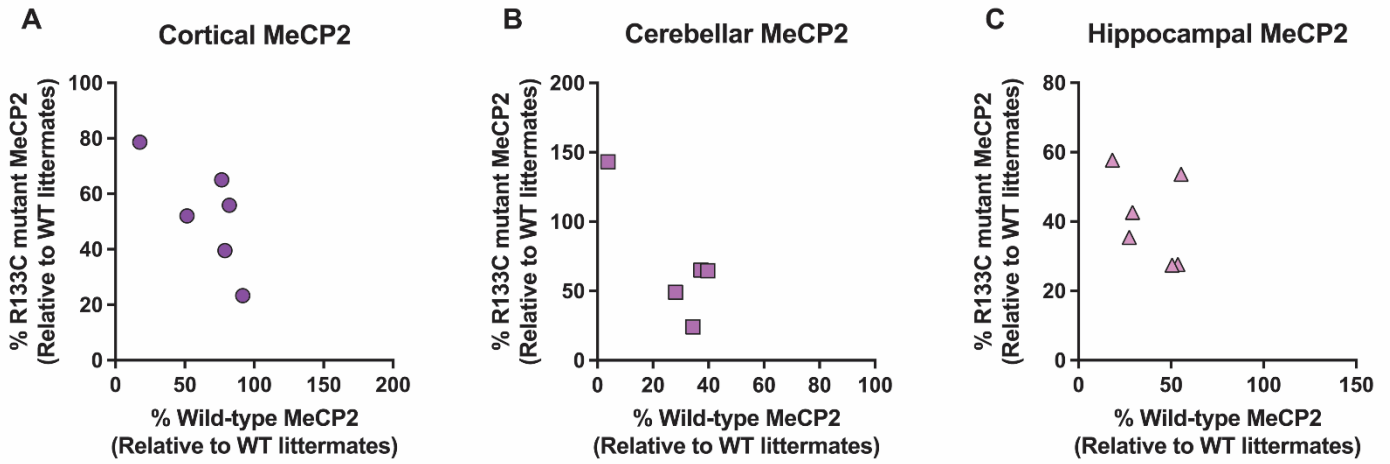

**Supplementary Figure 4: Variability of WT and R133C mutant MeCP2 expression in *Mecp2*<sup>R133C/+</sup> mice.**

The relationship of WT MeCP2 and the R133C mutant MeCP2 expression in the cortex, cerebellum and hippocampus of *Mecp2*<sup>R133C/+</sup> mice is illustrated. Each point corresponds to a mouse subject, and the expression of both forms of MeCP2 is normalized to the Gapdh control and presented as percentage expression relative to MeCP2 expression in WT littermates.

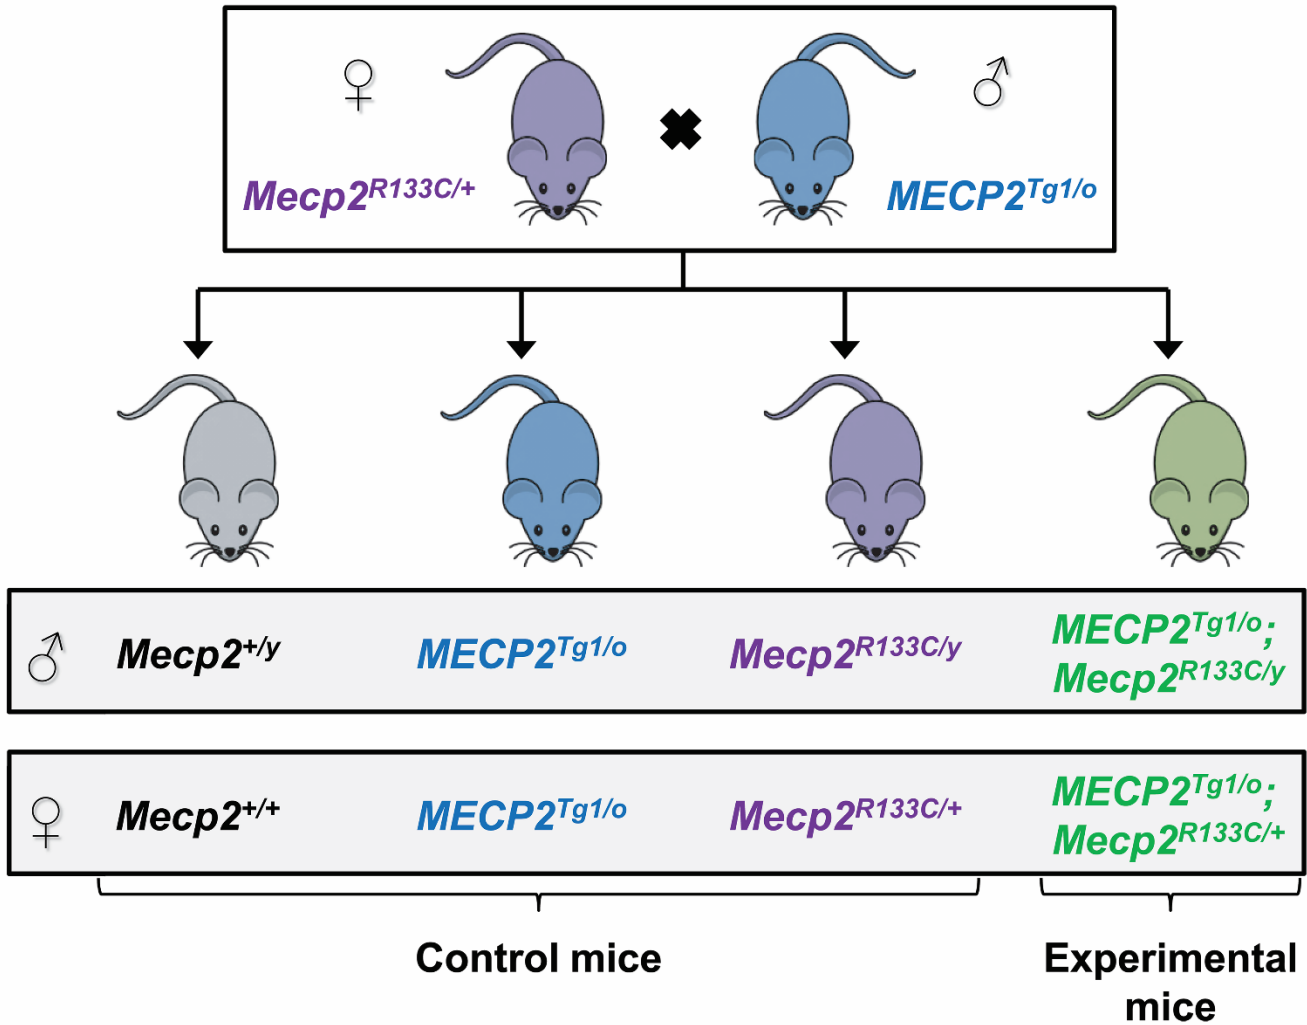

49 **Supplementary Figure 5: Breeding scheme to generate *Mecp2* R133C mice expressing an *MECP2***  
 50 **transgene.** Male  $MECP2^{Tg1/o}$  mice (blue) were bred with female  $Mecp2^{R133C/+}$  (purple) animals to introduce the  
 51 human *MECP2* transgene and generate the experimental mice  $MECP2^{Tg1/o}; Mecp2^{R133C/y}$  and  $MECP2^{Tg1/o};$   
 52  $Mecp2^{R133C/+}$  (green). Wild-type (gray),  $MECP2^{Tg1/o}$ , and  $Mecp2^{R133C/y}$  or  $Mecp2^{R133C/+}$  littermates were used as  
 53 controls.

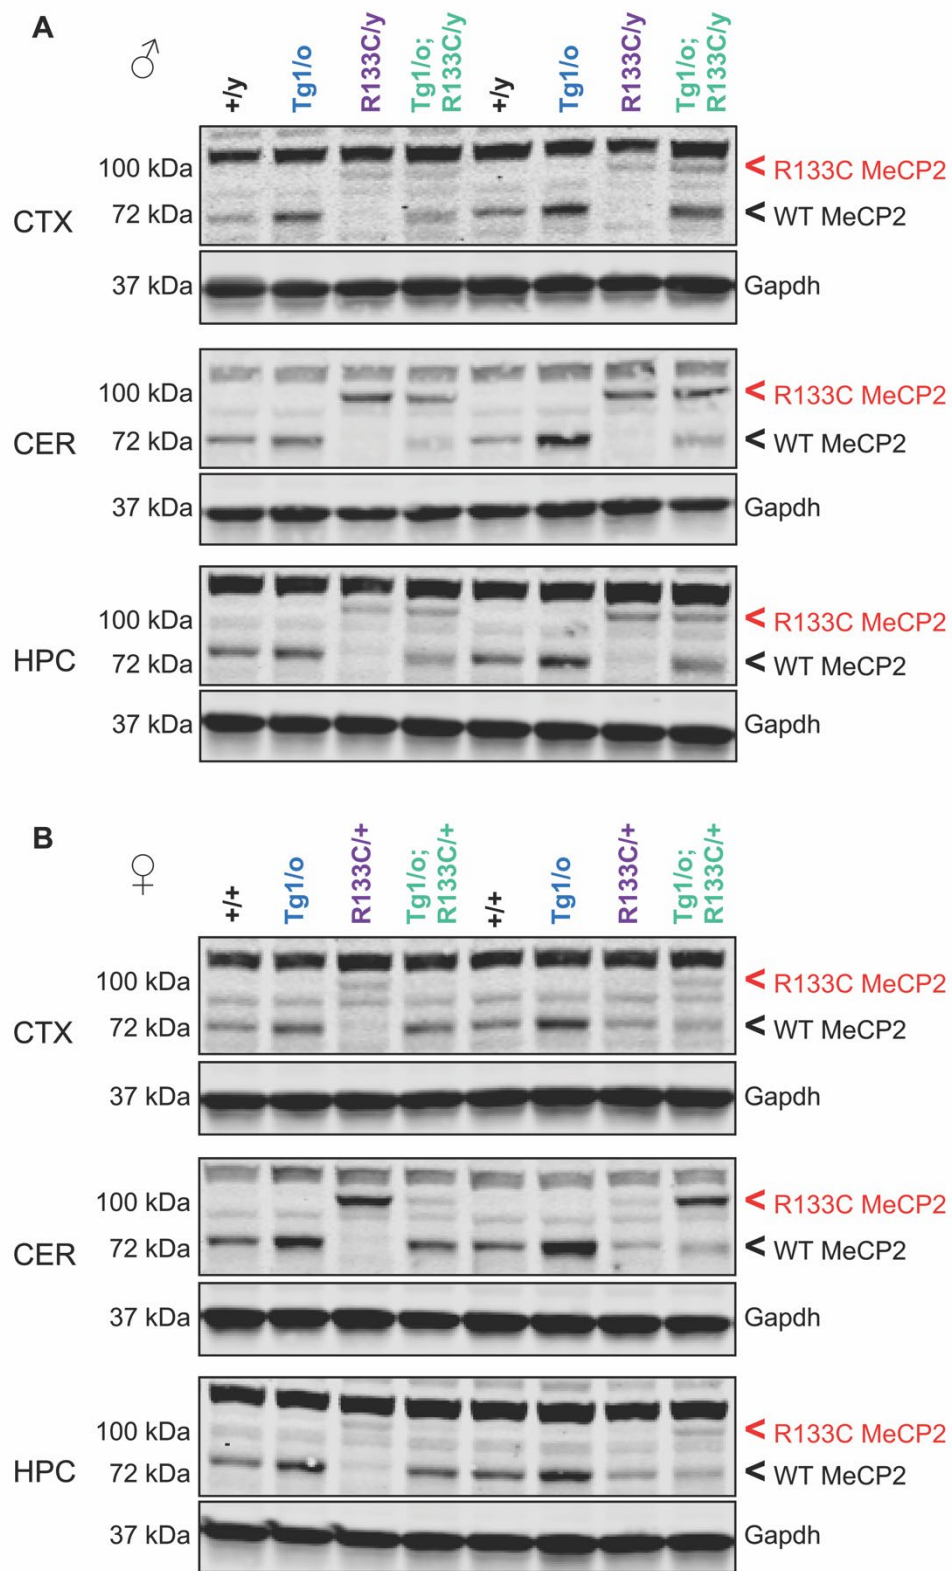

54 **Supplementary Figure 6: MeCP2 protein expression in *Mecp2* R133C mice with *MECP2* transgene. (A-B)**

55 Representative images of Western blots showing distinct bands for the R133C mutant (red arrow) and WT

56 MeCP2 (black arrow), as well as the Gapdh control, in male (♂) and female (♀) mice across several brain regions.



57 +/y or +/+ (WT), Tg1/o (*MECP2<sup>Tg1/o</sup>*), R133C/y or R133C/+ (*Mecp2 R133C*), Tg1; R133C/y or Tg1; R133C/+  
58 (*Mecp2 R133C* with *MECP2* transgene). CTX (cortex), CER (cerebellum), HPC (hippocampus).

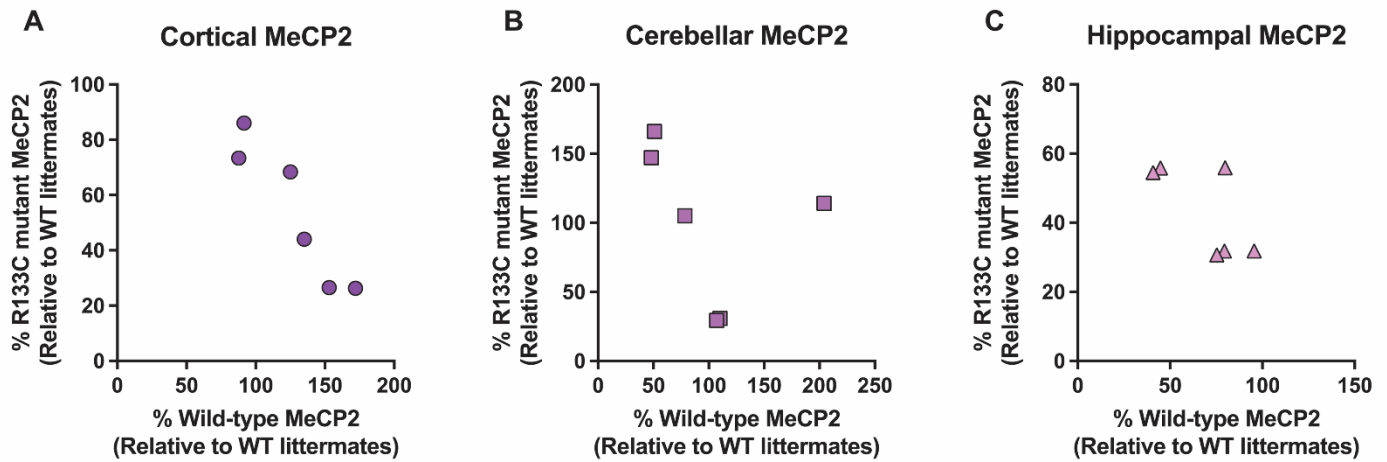

59 **Supplementary Figure 7: Variability of WT and *R133C* mutant MeCP2 expression in *MECP2*<sup>Tg1/o</sup>;**  
 60 ***Mecp2*<sup>R133C/+</sup> mice.** The relationship of WT MeCP2 and the *R133C* mutant MeCP2 expression in the cortex,  
 61 cerebellum and hippocampus of *Mecp2*<sup>R133C/+</sup> mice with the *MECP2* transgene is illustrated. Each point  
 62 corresponds to a mouse subject, and the expression of both forms of MeCP2 is normalized to the Gapdh control  
 63 and presented as percentage expression relative to MeCP2 expression in WT littermates.

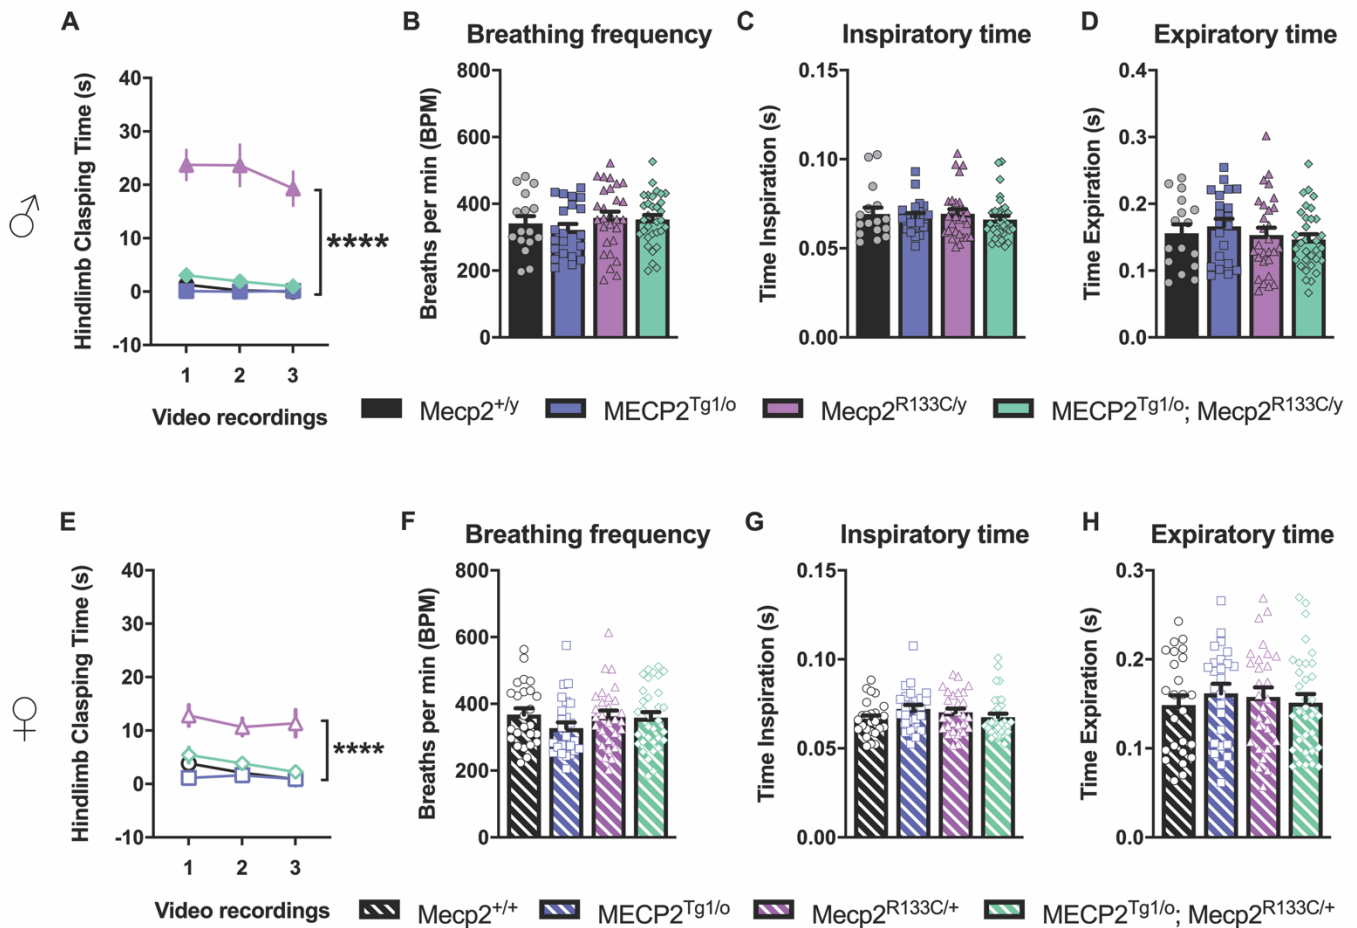

**Supplementary Figure 8: Hindlimb claspings and respiratory function parameters in *Mecp2 R133C* mice**

**with *MECP2* transgene.** (A, E) Hindlimb claspings is reversed across all ages in *MECP2<sup>Tg1/o</sup>; Mecp2<sup>R133C/y</sup>* and

*MECP2<sup>Tg1/o</sup>; Mecp2<sup>R133C/+</sup>* mice. Video recording numbers represent different ages: 6-9, 8-11 or 10-13 weeks old

in males; 20-23, 22-25 or 24-28 weeks old in females. (B-D, F-H) No differences in other respiratory parameters

between genotypes in males or females, including breathing frequency, and times of inspiration or expiration,

were observed. n=16-32 per genotype in males, n=25-40 per genotype in females. 1- or 2-way ANOVA with

Tukey's post-hoc tests. \*\*\*\*p<0.0001. WT = black bars or circles. *MECP2<sup>Tg1/o</sup>* = blue bars or squares. *Mecp2*

*R133C* = purple bars or triangles. *MECP2<sup>Tg1/o</sup>; Mecp2 R133C* = green bars or diamonds. Male (♂) = filled bars

or closed circles. Female (♀) = patterned bars or open circles.
